# Supplementary material
Source: HighWire-hosted journal article supplement (https://bmjopen.bmj.com/content/13/3/e063656)
Supplement: inline-supplementary-material-2 [file inline-supplementary-material-2.pdf]

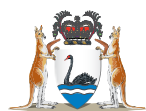

Government of **Western Australia**  
Department of **Health**

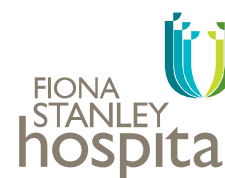

GPs address

Dear Dr.

Re: **Primary care Adherence To Heart Failure guidelines IN Diagnosis, Evaluation and Routine management (PATHFINDER) Research Project**

Patient details – name, DOB, address, URMN

The above patient under your care has recently consented to participate in the PATHFINDER Research Project being undertaken by Fiona Stanley Hospital (FSH) and has been allocated to the intervention group.

**What is the PATHFINDER project?** The aim of PATHFINDER is to support GPs in the delivery of guideline advocated management for patients with heart failure.

**What is involved for patients?** Patients hospitalised with heart failure will be encouraged to book 3 follow-up appointments with their GP over 3 months, as part of their routine care (reminders will be provided by the research team).

**What is involved for GPs?** At each appointment the patient will provide the GP with a form to help guide heart failure follow up care involving clinical assessment, medication titration, and further management actions. These appointments will be undertaken under the GP's normal consultation items and can be done by telehealth if required. Please fax the form back to FSH on the number below.

**What support is provided for GPs?** A Heart Failure Medication Titration Problem Solving Guide is provided on the rear of the follow-up form. The PATHFINDER Project also provides a helpline (**0480111493**, Mon – Fri, 8am-4pm) for GPs to contact if they are seeking guidance related to heart failure management. The helpline is staffed by a Specialist Heart Failure Nurse Practitioner supported by a Cardiologist from the Advanced Heart Failure Service at FSH.

**We would be grateful if you could incorporate the attached PATHFINDER follow-up form into this appointment by completing the actions in yellow and return the form by fax to 61524888.**

**Thank you for your support of this important initiative.**

Yours sincerely,

**Dr Amit Shah, Cardiologist**  
**Advanced Heart Failure and Cardiac Transplant Service, Fiona Stanley Hospital**

**Helpline: 0480111493 (Mon-Fri, 8am-4pm) Fax: 61524888**

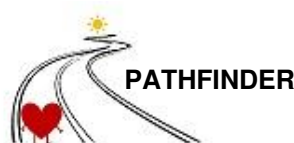

INFO PATHFINDER version 1 dated 22 Jan 2021
